# Supplementary material for: Geodynamic Settings of Late Paleozoic–Early Mesozoic Granitoid Magmatism at the Arctic Continental Margins: Insights from New Geochronological and Geochemical Data from the Taimyr Peninsula
Source: MDPI journal article supplement (doi:10.3390/min14040423), 2024-04-19
Supplement: s1 [file s1]

Photomicrographs of granitoids from Peka and Olenya river intrusions

Olenya river intrusion

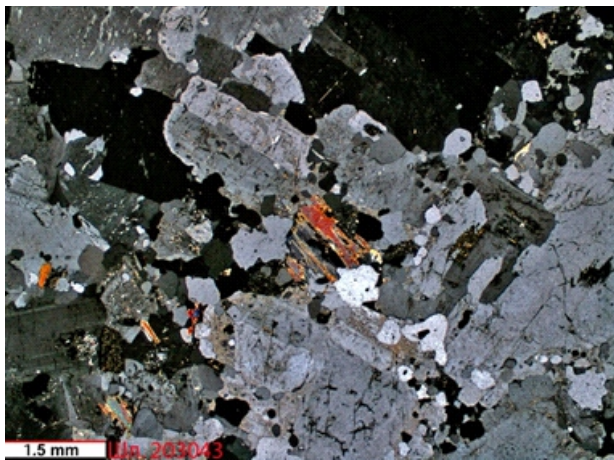

203043  
monzogranite

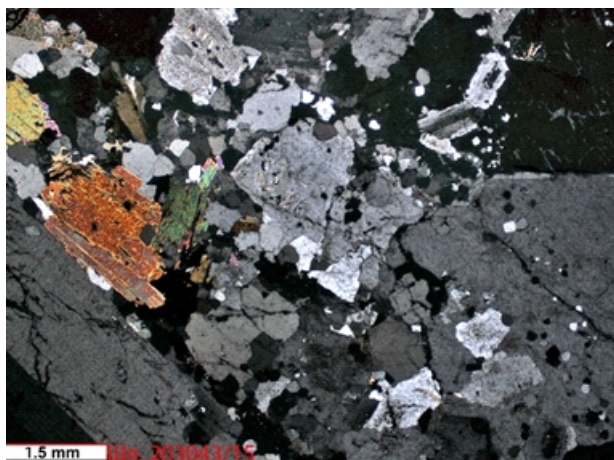

203043/15  
biotite monzogranite

Peka river intrusion

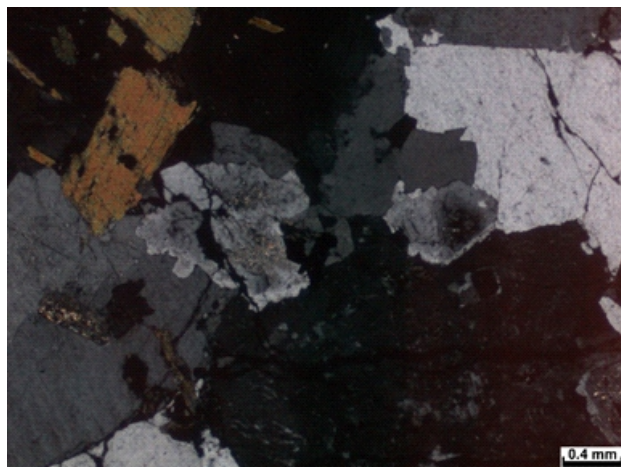

2023/1  
biotite granite

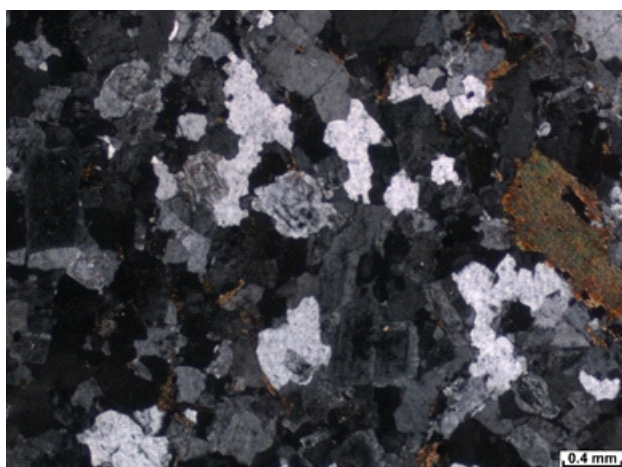

2024/1  
granite
