# Supplementary figures and images for: Geodynamic Settings of Late Paleozoic–Early Mesozoic Granitoid Magmatism at the Arctic Continental Margins: Insights from New Geochronological and Geochemical Data from the Taimyr Peninsula
Source: MDPI journal article supplement (doi:10.3390/min14040423), 2024-04-19

# BSE and CL-images of the studied zircon grains

203043-1

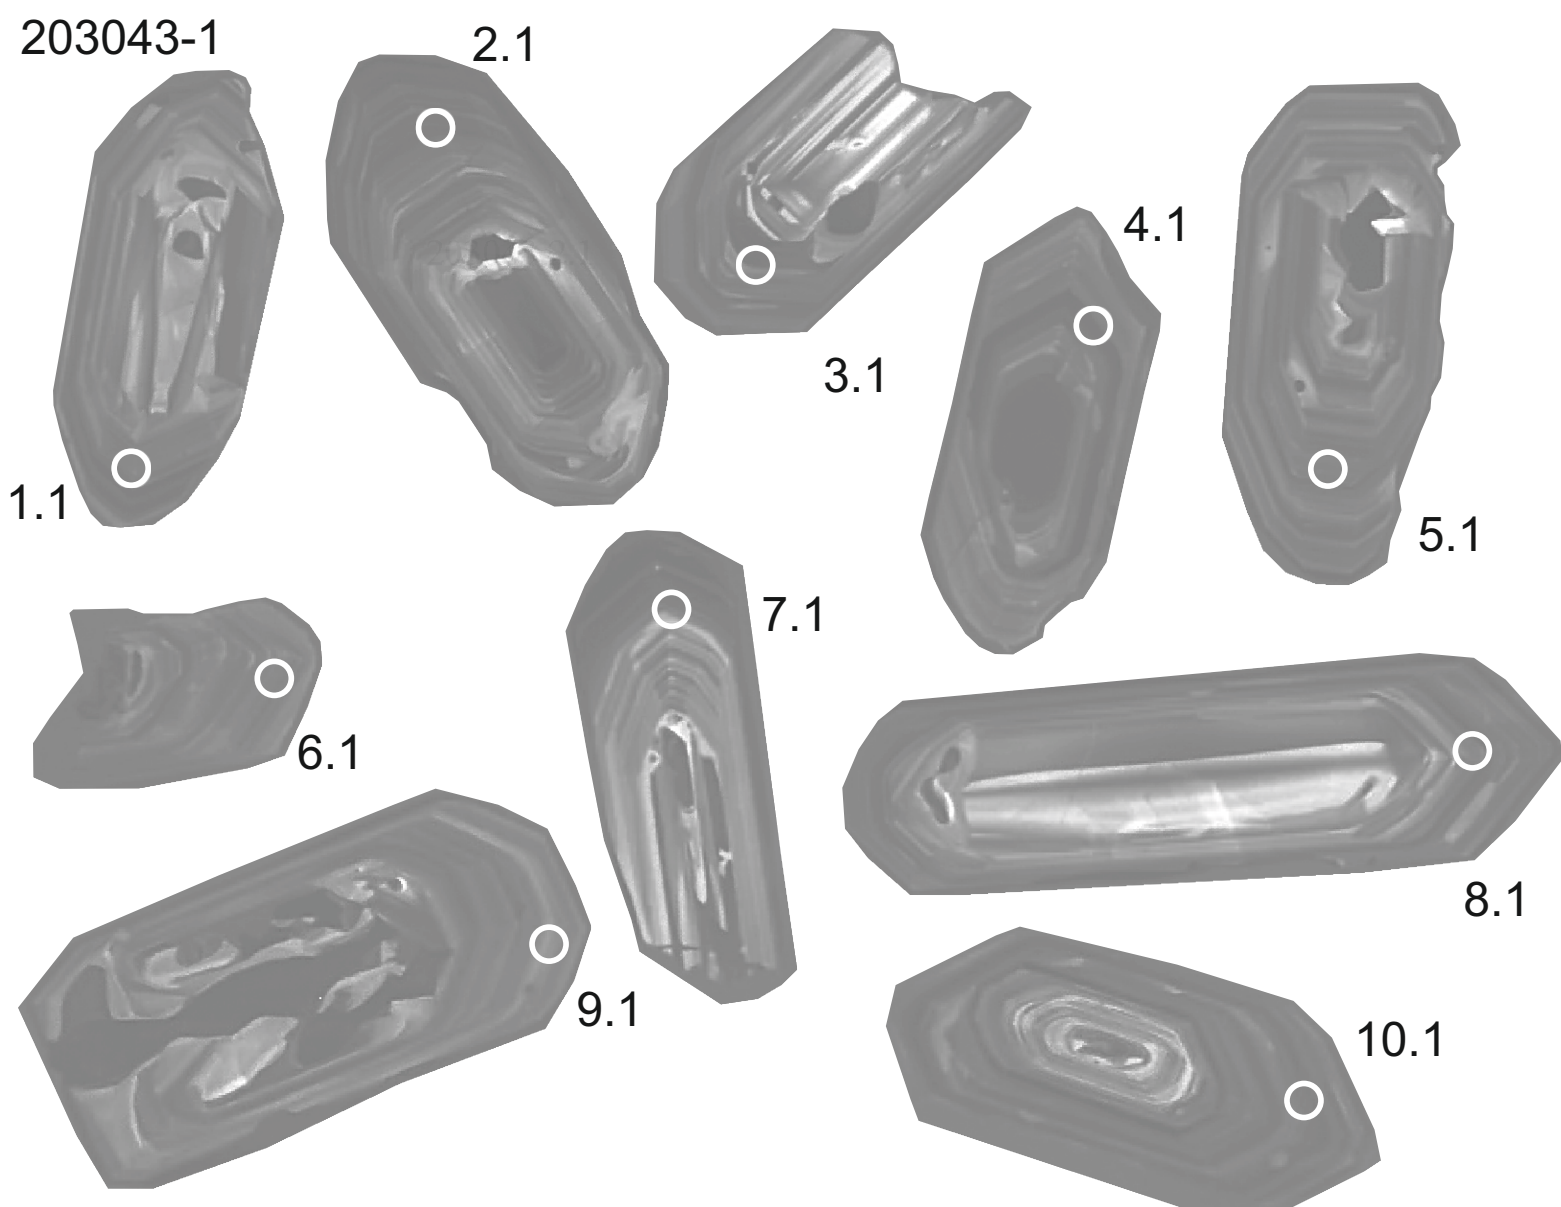

203043-3

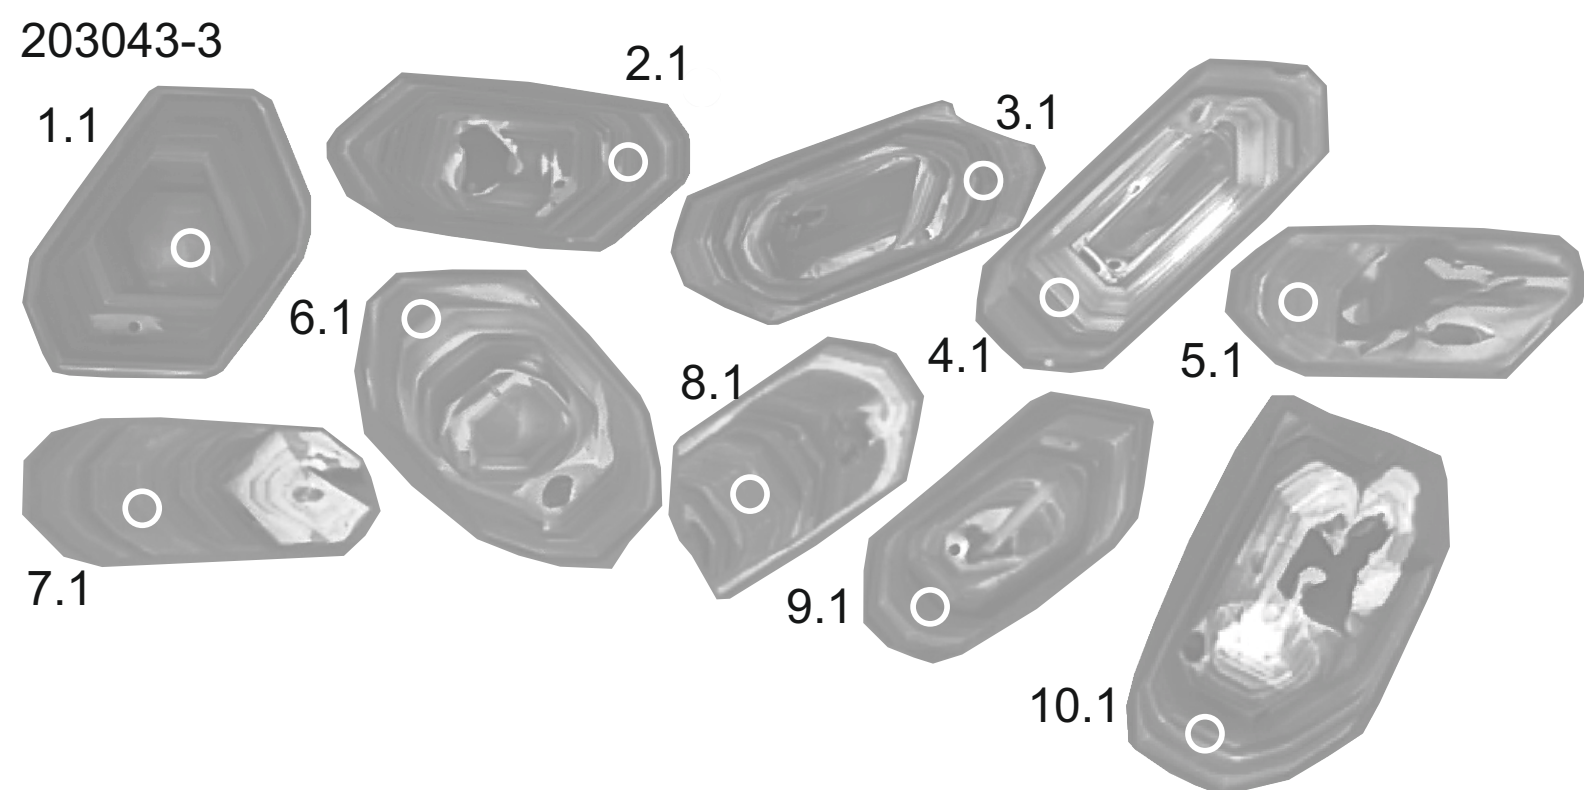

203043-11

200 μm

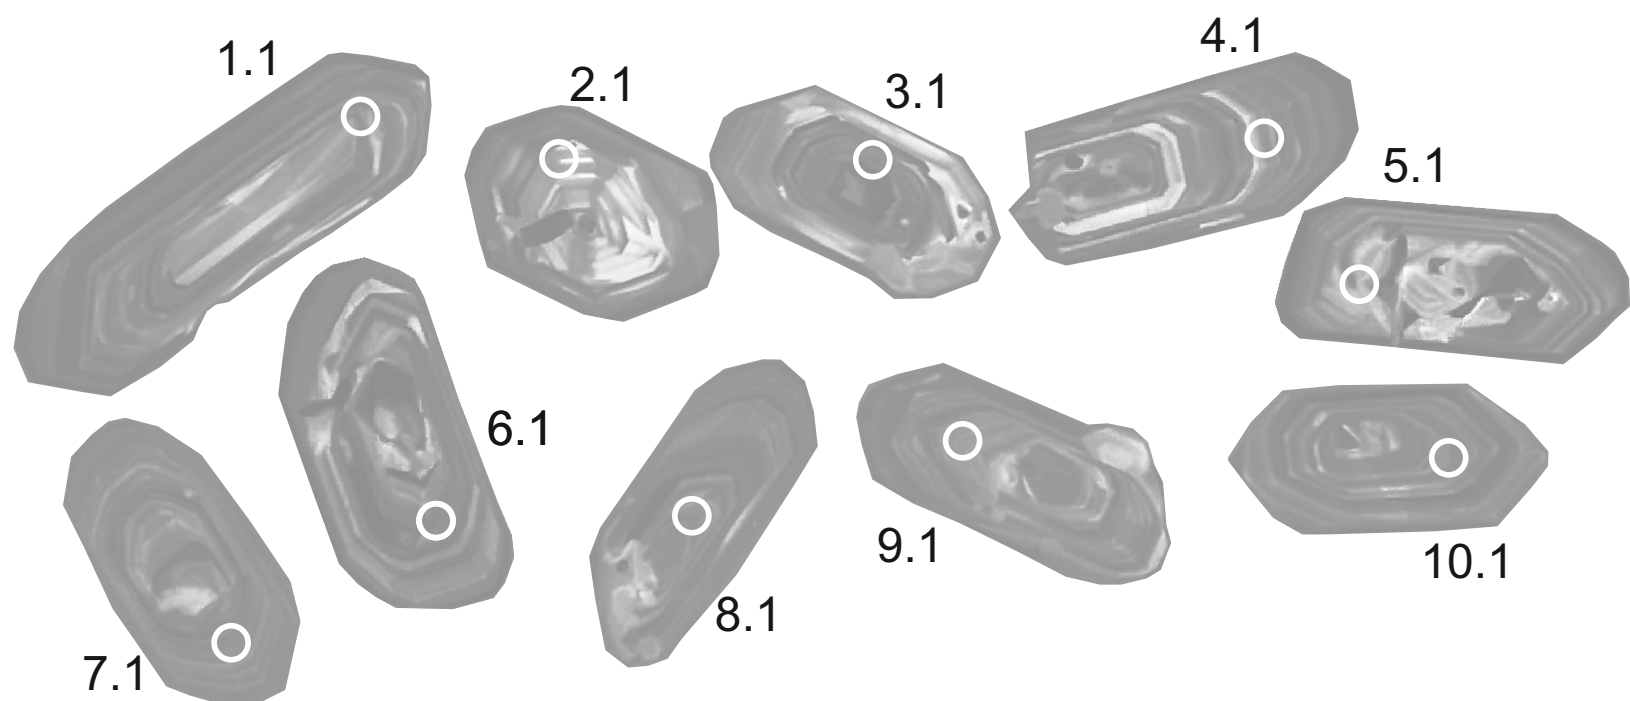

121068-2

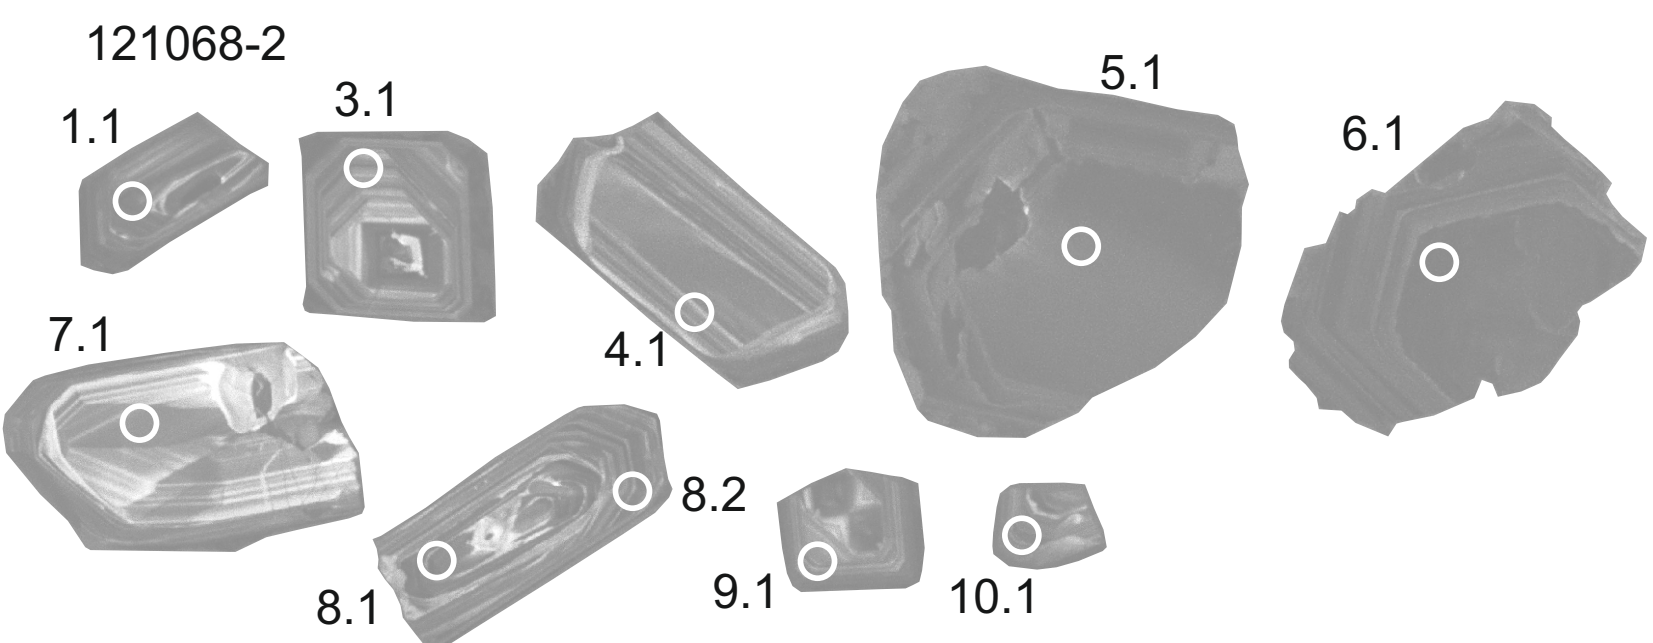

2023-1

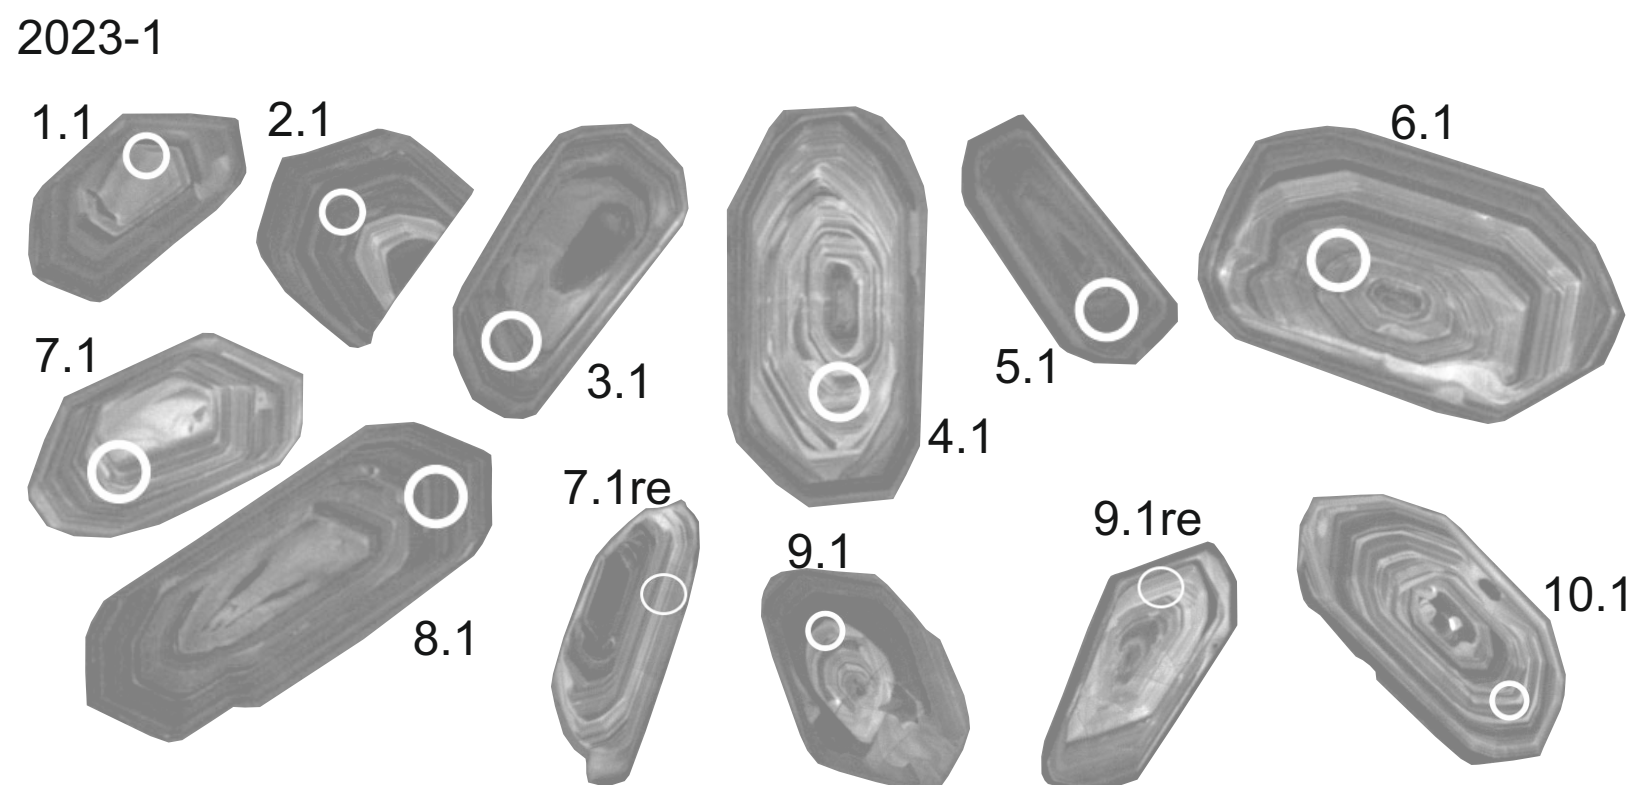

2024-1

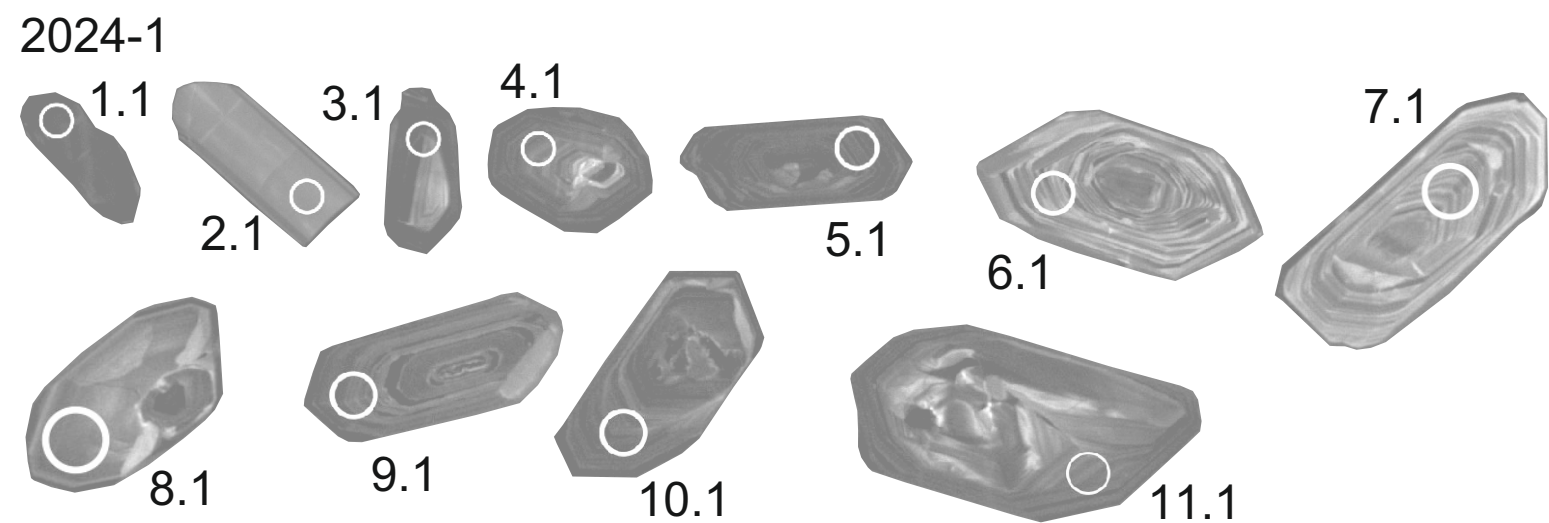

2031-9

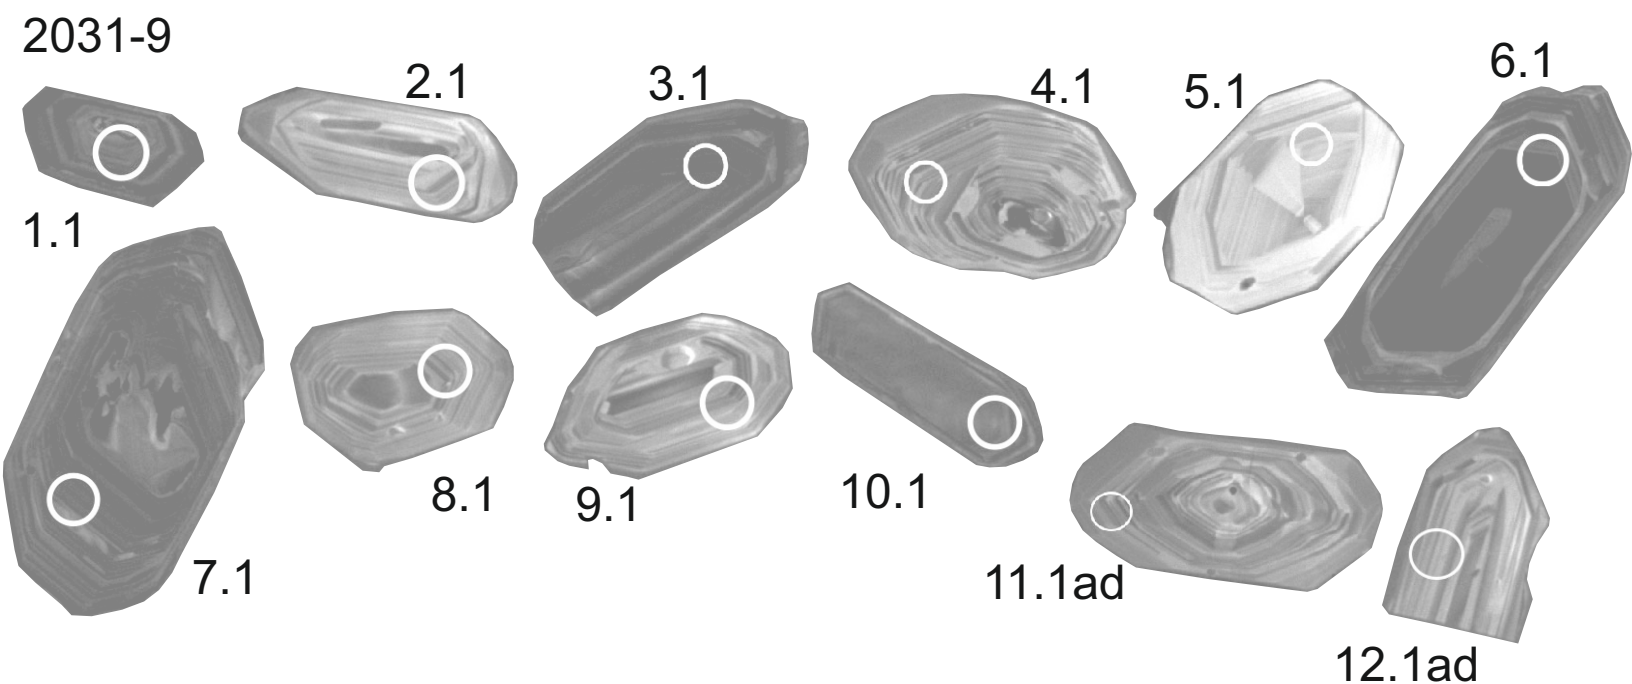

Supplement: s1 [file s1]
